# Supplementary material for: Social Stigma, Mental Health, Stress, and Health-Related Quality of Life in People with Long COVID
Source: MDPI journal article supplement (doi:10.3390/ijerph20053927), 2023-02-22
Supplement: s1 [file s1]

Supplemental Material

**Social Stigma, Mental Health, Stress, and Health-Related Quality of Life in People with Long COVID**

**Urte Scholz <sup>\*1 2</sup>, Walter Bierbauer <sup>1 2</sup>, Janina Lüscher <sup>3</sup>**

<sup>1</sup> Applied Social and Health Psychology, Department of Psychology, University of Zurich, Binzmuehlestrasse 14 / Box 14, 8050 Zurich, Switzerland

<sup>2</sup> University Research Priority Program “Dynamics of Healthy Aging”, University of Zurich, Stampfenbachstrasse 73I, 8006 Zurich, Switzerland

<sup>3</sup> Swiss Paraplegic Research, Guido A. Zaech-Strasse 4, 6207 Nottwil, Switzerland

\* Correspondence: [urte.scholz@psychologie.uzh.ch](mailto:urte.scholz@psychologie.uzh.ch)

Table S1: Correlations between main constructs and potential control variables age, and sex

| Psychological<br>measures                              | Age    | Sex <sup>a</sup> |
|--------------------------------------------------------|--------|------------------|
| 1. Total social<br>stigma                              | -.07   | .08              |
| 2. Enacted and<br>perceived<br>external<br>stigma      | -.01   | .11              |
| 3. Disclosure<br>concerns                              | -.04   | -.003            |
| 4. Internalized<br>stigma                              | -.19** | .01              |
| 5. Depressive<br>symptoms                              | -.09   | -.05             |
| 6. Anxiety                                             | -.08   | -.05             |
| 7. Perceived stress                                    | -.10   | .07              |
| 8. Physical hrqol                                      | -.01   | -.14*            |
| 9. Mental hrqol                                        | .03    | .02              |
| 10. Overall burden<br>of consequences of<br>Long COVID | -.08   | -.03             |
| 11. Overall burden<br>of Long COVID<br>symptoms        | -.13*  | .07              |

Note. \*  $p < .05$ . \*\*  $p < .01$ . <sup>a</sup> 0 = male, 1 = female; hrqol = health-related quality of life

**Table S2***Results of multiple regression analyses with enacted and perceived external stigma as predictor*

|                                             | Perceived stress <sup>a</sup> |              |                 |      | Depressive symptoms <sup>b</sup> |              |                 |      | Anxiety <sup>c</sup> |              |                 | Physical quality of life <sup>d</sup> |             |                |                 | Mental quality of life <sup>e</sup> |             |                |                 |       |
|---------------------------------------------|-------------------------------|--------------|-----------------|------|----------------------------------|--------------|-----------------|------|----------------------|--------------|-----------------|---------------------------------------|-------------|----------------|-----------------|-------------------------------------|-------------|----------------|-----------------|-------|
|                                             | <i>beta</i>                   | <i>b</i>     | <i>b</i> 95% CI |      | <i>beta</i>                      | <i>b</i>     | <i>b</i> 95% CI |      | <i>beta</i>          | <i>b</i>     | <i>b</i> 95% CI |                                       | <i>beta</i> | <i>b</i>       | <i>b</i> 95% CI |                                     | <i>beta</i> | <i>b</i>       | <i>b</i> 95% CI |       |
|                                             |                               |              | LL              | UL   |                                  |              | LL              | UL   |                      |              | LL              | UL                                    |             |                | LL              | UL                                  |             |                | LL              | UL    |
| Intercept                                   |                               | <b>.88**</b> | .35             | 1.40 |                                  | 1.52         | -.69            | 3.73 |                      | <b>2.76*</b> | .44             | 5.08                                  |             | <b>71.29**</b> | 63.22           | 79.35                               |             | <b>65.66**</b> | 55.98           | 75.34 |
| Enacted and<br>perceived<br>external stigma | .25                           | <b>.17**</b> | .08             | .25  | .19                              | <b>.59**</b> | .23             | .95  | .09                  | .30          | -.09            | .69                                   | -.13        | <b>-1.02*</b>  | -1.96           | -.09                                | -.19        | <b>-1.52**</b> | -2.55           | -.50  |
| Overall disease<br>strain                   | .23                           | <b>.07**</b> | .03             | .11  | .14                              | <b>.21*</b>  | .04             | .38  | -.07                 | -.10         | -.28            | .08                                   | -.20        | <b>-.70**</b>  | -1.14           | -.26                                | -.17        | <b>-.64*</b>   | -1.13           | -.14  |
| Overall symptom<br>strain                   | .02                           | .01          | -.05            | .07  | .04                              | .10          | -.16            | .36  | .06                  | .14          | -.14            | .42                                   | -.28        | <b>-1.49**</b> | -2.17           | -.81                                | -.18        | <b>-1.02*</b>  | -1.80           | -.25  |
| Anxiety                                     |                               |              |                 |      | .46                              | <b>.45**</b> | .34             | .56  |                      |              |                 |                                       |             |                |                 |                                     |             |                |                 |       |
| Depressive<br>symptoms                      |                               |              |                 |      |                                  |              |                 |      | .49                  | <b>.50**</b> | .38             | .62                                   |             |                |                 |                                     |             |                |                 |       |
| Sex <sup>f</sup>                            |                               |              |                 |      |                                  |              |                 |      |                      |              |                 |                                       | -.12        | <b>-3.82*</b>  | -7.48           | -.16                                |             |                |                 |       |
| Mental hrqol <sup>g</sup>                   |                               |              |                 |      |                                  |              |                 |      |                      |              |                 |                                       | -.32        | <b>-.30**</b>  | -.41            | -.19                                |             |                |                 |       |
| Physical hrqol <sup>g</sup>                 |                               |              |                 |      |                                  |              |                 |      |                      |              |                 |                                       |             |                |                 |                                     | -.35        | <b>-.37**</b>  | -.51            | -.24  |

*Note.* \*  $p < .05$ . \*\*  $p < .01$ . Empty rows indicate that the covariate was not included in the analysis. Coefficients in bold are significant.  $\Delta R^2$  is the added explained variance of total stigma predictor after controlling for covariates. <sup>a</sup> adjusted  $R^2 = 0.12$ ;  $\Delta R^2 = 0.06$ . <sup>b</sup> adjusted  $R^2 = 0.33$ ;  $\Delta R^2 = 0.03$ . <sup>c</sup> adjusted  $R^2 = 0.28$ ;  $\Delta R^2 = 0.01$ . <sup>d</sup> adjusted  $R^2 = 0.24$ ;  $\Delta R^2 = 0.02$ . <sup>e</sup> adjusted  $R^2 = 0.16$ ;  $\Delta R^2 = 0.03$ . <sup>f</sup> 0 = male, 1 = female. <sup>g</sup> hrqol = health-related quality of life

**Table S3***Results of multiple regression analyses with disclosure concerns as predictor*

|                             | Perceived stress <sup>a</sup> |              |                 |      | Depressive symptoms <sup>b</sup> |              |                 |      | Anxiety <sup>c</sup> |              |                 | Physical quality of life <sup>d</sup> |             |                | Mental quality of life <sup>e</sup> |       |      |                |       |       |
|-----------------------------|-------------------------------|--------------|-----------------|------|----------------------------------|--------------|-----------------|------|----------------------|--------------|-----------------|---------------------------------------|-------------|----------------|-------------------------------------|-------|------|----------------|-------|-------|
|                             | <i>beta</i>                   | <i>b</i>     | <i>b</i> 95% CI |      | <i>beta</i>                      | <i>b</i>     | <i>b</i> 95% CI |      | <i>beta</i>          | <i>b</i>     | <i>b</i> 95% CI |                                       | <i>beta</i> | <i>b</i>       | <i>b</i> 95% CI                     |       |      |                |       |       |
|                             |                               |              | LL              | UL   |                                  |              | LL              | UL   |                      |              | LL              | UL                                    |             |                | LL                                  | UL    |      |                |       |       |
| Intercept                   |                               | <b>.78**</b> | .25             | 1.31 |                                  | 1.20         | -1.04           | 3.43 |                      | <b>2.50*</b> | .24             | 4.76                                  |             | <b>71.80**</b> | 63.60                               | 80.01 |      | <b>65.48**</b> | 55.83 | 75.12 |
| Disclosure concerns         | .19                           | <b>.12**</b> | .04             | .19  | .08                              | .22          | -.11            | .55  | .21                  | <b>.62**</b> | .29             | .95                                   | -.06        | -.41           | -1.24                               | .42   | -.19 | <b>-1.43**</b> | -2.32 | -.54  |
| Overall disease strain      | .23                           | <b>.07**</b> | .03             | .11  | .15                              | <b>.23*</b>  | .05             | .40  | -.07                 | -.11         | -.29            | .06                                   | -.20        | <b>-.72**</b>  | -1.17                               | -.28  | -.16 | <b>-.62*</b>   | -1.11 | -.12  |
| Overall symptom strain      | .06                           | .03          | -.03            | .09  | .08                              | .18          | -.08            | .44  | .07                  | .15          | -.11            | .42                                   | -.30        | <b>-1.63**</b> | -2.30                               | -.96  | -.20 | <b>-1.15**</b> | -1.91 | -.38  |
| Anxiety                     |                               |              |                 |      | .47                              | <b>.46**</b> | .35             | .58  |                      |              |                 |                                       |             |                |                                     |       |      |                |       |       |
| Depressive symptoms         |                               |              |                 |      |                                  |              |                 |      | .47                  | <b>.48**</b> | .36             | .60                                   |             |                |                                     |       |      |                |       |       |
| Sex <sup>f</sup>            |                               |              |                 |      |                                  |              |                 |      |                      |              |                 |                                       | -.13        | <b>-4.26*</b>  | -7.92                               | -.59  |      |                |       |       |
| Mental hrqol <sup>g</sup>   |                               |              |                 |      |                                  |              |                 |      |                      |              |                 |                                       | -.31        | <b>-.29**</b>  | -.40                                | -.18  |      |                |       |       |
| Physical hrqol <sup>g</sup> |                               |              |                 |      |                                  |              |                 |      |                      |              |                 |                                       |             |                |                                     |       | -.33 | <b>-.35**</b>  | -.486 | -.22  |

*Note.* \*  $p < .05$ . \*\*  $p < .01$ . Empty rows indicate that the covariate was not included in the analysis. Coefficients in bold are significant.  $\Delta R^2$  is the added explained variance of total stigma predictor after controlling for covariates. <sup>a</sup> adjusted  $R^2 = 0.11$ ;  $\Delta R^2 = 0.04$ . <sup>b</sup> adjusted  $R^2 = 0.31$ ;  $\Delta R^2 = 0.01$ . <sup>c</sup> adjusted  $R^2 = 0.31$ ;  $\Delta R^2 = 0.04$ . <sup>d</sup> adjusted  $R^2 = 0.22$ ;  $\Delta R^2 = 0.003$ . <sup>e</sup> adjusted  $R^2 = 0.16$ ;  $\Delta R^2 = 0.04$ . <sup>f</sup> 0 = male, 1 = female. <sup>g</sup> hrqol = health-related quality of life

**Table S4***Results of multiple regression analyses with internalized stigma as predictor*

|                             | Perceived stress <sup>a</sup> |              |                 |      | Depressive symptoms <sup>b</sup> |              |                 |      | Anxiety <sup>c</sup> |               |                 | Physical quality of life <sup>d</sup> |             |                | Mental quality of life <sup>e</sup> |       |      |                |       |       |
|-----------------------------|-------------------------------|--------------|-----------------|------|----------------------------------|--------------|-----------------|------|----------------------|---------------|-----------------|---------------------------------------|-------------|----------------|-------------------------------------|-------|------|----------------|-------|-------|
|                             | <i>beta</i>                   | <i>b</i>     | <i>b</i> 95% CI |      | <i>beta</i>                      | <i>b</i>     | <i>b</i> 95% CI |      | <i>beta</i>          | <i>b</i>      | <i>b</i> 95% CI |                                       | <i>beta</i> | <i>b</i>       | <i>b</i> 95% CI                     |       |      |                |       |       |
|                             |                               |              | LL              | UL   |                                  |              | LL              | UL   |                      |               | LL              | UL                                    |             |                | LL                                  | UL    |      |                |       |       |
| Intercept                   |                               | <b>.87**</b> | .35             | 1.38 |                                  | 1.74         | -.47            | 3.95 |                      | <b>3.19**</b> | .95             | 5.43                                  |             | <b>71.12**</b> | 62.86                               | 79.39 |      | <b>62.59**</b> | 53.11 | 72.06 |
| Internalized stigma         | .27                           | <b>.21**</b> | .11             | .30  | .22                              | <b>.79**</b> | .36             | 1.21 | .28                  | <b>1.00**</b> | .57             | 1.44                                  | .01         | .11            | -.98                                | 1.19  | -.28 | <b>-2.59**</b> | -3.69 | -1.49 |
| Overall disease strain      | .22                           | <b>.07**</b> | .03             | .11  | .14                              | <b>.20*</b>  | .04             | .37  | -.07                 | -.11          | -.29            | .06                                   | -.21        | <b>-.74**</b>  | -1.19                               | -.30  | -.14 | <b>-.55*</b>   | -1.04 | -.06  |
| Overall symptom strain      | .04                           | .02          | -.05            | .08  | .06                              | .14          | -.12            | .40  | .05                  | .11           | -.15            | .38                                   | -.31        | <b>-1.66**</b> | -2.34                               | -.98  | -.16 | <b>-.93*</b>   | -1.68 | -.17  |
| Anxiety                     |                               |              |                 |      | .40                              | <b>.40**</b> | .28             | .51  |                      |               |                 |                                       |             |                |                                     |       |      |                |       |       |
| Depressive symptoms         |                               |              |                 |      |                                  |              |                 |      | .41                  | <b>.41**</b>  | .29             | .54                                   |             |                |                                     |       |      |                |       |       |
| Sex <sup>f</sup>            |                               |              |                 |      |                                  |              |                 |      |                      |               |                 |                                       | -.14        | <b>-4.31*</b>  | -7.99                               | -.63  |      |                |       |       |
| Mental hrqol <sup>g</sup>   |                               |              |                 |      |                                  |              |                 |      |                      |               |                 |                                       | -.30        | <b>-2.28**</b> | -.39                                | -.16  |      |                |       |       |
| Physical hrqol <sup>g</sup> |                               |              |                 |      |                                  |              |                 |      |                      |               |                 |                                       |             |                |                                     |       | -.30 | <b>-.32**</b>  | -.45  | -.19  |

*Note.* <sup>\*</sup>  $p < .05$ . <sup>\*\*</sup>  $p < .01$ . Empty rows indicate that the covariate was not included in the analysis. Coefficients in bold are significant.  $\Delta R^2$  is the added explained variance of total stigma predictor after controlling for covariates. <sup>a</sup> adjusted  $R^2 = 0.14$ ;  $\Delta R^2 = 0.07$ . <sup>b</sup> adjusted  $R^2 = 0.34$ ;  $\Delta R^2 = 0.04$ . <sup>c</sup> adjusted  $R^2 = 0.33$ ;  $\Delta R^2 = 0.06$ . <sup>d</sup> adjusted  $R^2 = 0.22$ ;  $\Delta R^2 = 0.00$ . <sup>e</sup> adjusted  $R^2 = 0.20$ ;  $\Delta R^2 = 0.08$ . <sup>f</sup> 0 = male, 1 = female. <sup>g</sup> hrqol = health-related quality of life

**Table S5**

*Results of multiple regression analyses with social stigma (total score) as predictor with the subsample of participants who had an official confirmation of their Long Covid condition*

|                             | Perceived stress <sup>a</sup> |              |                 | Depressive symptoms <sup>b</sup> |              |                 | Anxiety <sup>c</sup> |              |                 | Physical quality of life <sup>d</sup> |                |                 | Mental quality of life <sup>e</sup> |                |                 |
|-----------------------------|-------------------------------|--------------|-----------------|----------------------------------|--------------|-----------------|----------------------|--------------|-----------------|---------------------------------------|----------------|-----------------|-------------------------------------|----------------|-----------------|
|                             | n=190                         |              |                 | n=190                            |              |                 | n=190                |              |                 | n=185                                 |                |                 | n=188                               |                |                 |
|                             | <i>beta</i>                   | <i>b</i>     | <i>b</i> 95% CI | <i>beta</i>                      | <i>b</i>     | <i>b</i> 95% CI | <i>beta</i>          | <i>b</i>     | <i>b</i> 95% CI | <i>beta</i>                           | <i>b</i>       | <i>b</i> 95% CI | <i>beta</i>                         | <i>b</i>       | <i>b</i> 95% CI |
|                             |                               |              | LL UL           |                                  |              | LL UL           |                      |              | LL UL           |                                       |                | LL UL           |                                     |                | LL UL           |
| Intercept                   |                               | <b>.86**</b> | .03 1.21        |                                  | 1.81         | -.79 4.41       |                      | 1.15         | - 3.87          |                                       | <b>70.06**</b> | 59.70 80.42     |                                     | <b>67.44**</b> | 56.47 78.42     |
| Stigma                      | .32                           | <b>.26**</b> | .15 .36         | .22                              | <b>.91**</b> | .43 1.40        | .20                  | <b>.77**</b> | .26 1.28        | 1.58                                  | 1.58           | 1.28            | -.16                                | -1.19          | -2.46 .09       |
| Overall burden of disease   | .22                           | <b>.07**</b> | .03 .12         | .13                              | .11          | -.09 .31        | .06                  | .10          | -.11 .31        | -.13                                  | <b>-.59*</b>   | -1.13 -.06      | -.15                                | <b>-.63*</b>   | -1.22 -.04      |
| Overall burden of symptoms  | -.01                          | -.003        | -.08 -.07       | .04                              | .13          | -.18 .44        | .05                  | .12          | -.20 .44        | -.25                                  | <b>-1.47**</b> | -2.30 -.64      | -.17                                | <b>-1.08*</b>  | -2.02 -.14      |
| Anxiety                     |                               |              |                 | .42                              | <b>.41**</b> | .29 .54         |                      |              |                 |                                       |                |                 |                                     |                |                 |
| Depressive symptoms         |                               |              |                 |                                  |              |                 | .44                  | <b>.45**</b> | .31 .58         |                                       |                |                 |                                     |                |                 |
| Sex <sup>f</sup>            |                               |              |                 |                                  |              |                 |                      |              |                 | -.11                                  | -3.85          | -8.73 1.02      |                                     |                |                 |
| Mental hrqol <sup>g</sup>   |                               |              |                 |                                  |              |                 |                      |              |                 | -.33                                  | <b>-.30**</b>  | -.42 -.17       |                                     |                |                 |
| Physical hrqol <sup>g</sup> |                               |              |                 |                                  |              |                 |                      |              |                 |                                       |                |                 | -.33                                | <b>-.36**</b>  | -.51 -.21       |

*Note.* \*  $p < .05$ . \*\*  $p < .01$ . Empty rows indicate that the covariate was not included in the analysis of this specific outcome. Coefficients in bold are significant.  $\Delta R^2$  is the added explained variance of total stigma predictor after controlling for covariates.

<sup>a</sup> adjusted  $R^2 = 0.16$ ;  $\Delta R^2 = 0.10$ . <sup>b</sup> adjusted  $R^2 = 0.35$ ;  $\Delta R^2 = 0.05$ . <sup>c</sup> adjusted  $R^2 = 0.30$ ;  $\Delta R^2 = 0.03$ . <sup>d</sup> adjusted  $R^2 = 0.18$ ;  $\Delta R^2 = 0.02$ . <sup>e</sup> adjusted  $R^2 = 0.20$ ;  $\Delta R^2 = 0.07$ . <sup>f</sup> 0 = male, 1 = female. <sup>g</sup> hrqol = health-related quality of life.

**Table S6**

*Results of multiple regression analyses with enacted and perceived external stigma as predictor with the subsample of participants who had an official confirmation of their Long Covid condition*

|                                             | Perceived stress <sup>a</sup> |              |                 |      | Depressive symptoms <sup>b</sup> |              |                 |      | Anxiety <sup>c</sup> |              |                 | Physical quality of life <sup>d</sup> |             |                |                 | Mental quality of life <sup>e</sup> |             |                |                 |       |
|---------------------------------------------|-------------------------------|--------------|-----------------|------|----------------------------------|--------------|-----------------|------|----------------------|--------------|-----------------|---------------------------------------|-------------|----------------|-----------------|-------------------------------------|-------------|----------------|-----------------|-------|
|                                             | n=190                         |              |                 |      | n=190                            |              |                 |      | n=190                |              |                 | n=185                                 |             |                |                 | n=188                               |             |                |                 |       |
|                                             | <i>beta</i>                   | <i>b</i>     | <i>b</i> 95% CI |      | <i>beta</i>                      | <i>b</i>     | <i>b</i> 95% CI |      | <i>beta</i>          | <i>b</i>     | <i>b</i> 95% CI |                                       | <i>beta</i> | <i>b</i>       | <i>b</i> 95% CI |                                     | <i>beta</i> | <i>b</i>       | <i>b</i> 95% CI |       |
|                                             |                               |              | LL              | UL   |                                  |              | LL              | UL   |                      |              | LL              | UL                                    |             |                | LL              | UL                                  |             |                | LL              | UL    |
| Intercept                                   |                               | <b>.88**</b> | .25             | 1.51 |                                  | 1.79         | -.83            | 4.41 |                      | .95          | -               | 3.73                                  |             | <b>69.51**</b> | 59.22           | 79.80                               |             | <b>67.66**</b> | 56.51           | 78.80 |
| Enacted and<br>perceived<br>external stigma | .26                           | <b>.17**</b> | .08             | .27  | .21                              | <b>.65**</b> | .26             | 1.03 | .07                  | .21          | 1.83<br>- .21   | .637                                  | -.15        | <b>-1.13*</b>  | -2.18           | -.08                                | -.22        | <b>-1.84**</b> | -3.00           | -.69  |
| Overall disease<br>strain                   | .23                           | <b>.08**</b> | .03             | .12  | .07                              | .11          | -.09            | .31  | .06                  | .11          | -.11            | .316                                  | -1.6        | <b>-.59*</b>   | -1.12           | -.06                                | -.16        | <b>-.66*</b>   | -1.26           | -.06  |
| Overall symptom<br>strain                   | .01                           | .004         | -.07            | .08  | .05                              | .13          | -.18            | .44  | .07                  | .17          | -.16            | .50                                   | -.25        | <b>-.14**</b>  | -2.27           | -.61                                | -.18        | <b>-1.17*</b>  | -2.12           | -.22  |
| Anxiety                                     |                               |              |                 |      | .47                              | <b>.46**</b> | .34             | .58  |                      |              |                 |                                       |             |                |                 |                                     |             |                |                 |       |
| Depressive<br>symptoms                      |                               |              |                 |      |                                  |              |                 |      | .50                  | <b>.51**</b> | .38             | .64                                   |             |                |                 |                                     |             |                |                 |       |
| Sex <sup>f</sup>                            |                               |              |                 |      |                                  |              |                 |      |                      |              |                 |                                       | -.10        | -3.73          | -8.59           | 1.13                                |             |                |                 |       |
| Mental hrqol <sup>g</sup>                   |                               |              |                 |      |                                  |              |                 |      |                      |              |                 |                                       | -.33        | <b>-.29**</b>  | -.411           | -1.68                               |             |                |                 |       |
| Physical hrqol <sup>g</sup>                 |                               |              |                 |      |                                  |              |                 |      |                      |              |                 |                                       |             |                |                 |                                     | -.33        | <b>-.37**</b>  | -.53            | -.22  |

*Note.* \* $p < .05$ . \*\* $p < .01$ . Empty rows indicate that the covariate was not included in the analysis. Coefficients in bold are significant.  $\Delta R^2$  is the added explained variance of total stigma predictor after controlling for covariates. <sup>a</sup> adjusted  $R^2 = 0.13$ ;  $\Delta R^2 = 0.06$ . <sup>b</sup> adjusted  $R^2 = 0.34$ ;  $\Delta R^2 = 0.04$ . <sup>c</sup> adjusted  $R^2 = 0.30$ ;  $\Delta R^2 = 0.004$ . <sup>d</sup> adjusted  $R^2 = 0.18$ ;  $\Delta R^2 = 0.02$ . <sup>e</sup> adjusted  $R^2 = 0.17$ ;  $\Delta R^2 = 0.04$ . <sup>f</sup> 0 = male, 1 = female. <sup>g</sup> hrqol = health-related quality of life

**Table S7**

*Results of multiple regression analyses with disclosure concerns as predictor with the subsample of participants who had an official confirmation of their Long Covid condition*

|                             | Perceived stress <sup>a</sup> |              |                 | Depressive symptoms <sup>b</sup> |              |                 | Anxiety <sup>c</sup> |              |                 | Physical quality of life <sup>d</sup> |                |                 | Mental quality of life <sup>e</sup> |                |                     |
|-----------------------------|-------------------------------|--------------|-----------------|----------------------------------|--------------|-----------------|----------------------|--------------|-----------------|---------------------------------------|----------------|-----------------|-------------------------------------|----------------|---------------------|
|                             | n=190                         |              |                 | n=190                            |              |                 | n=190                |              |                 | n=185                                 |                |                 | n=188                               |                |                     |
|                             | <i>beta</i>                   | <i>b</i>     | <i>b</i> 95% CI | <i>beta</i>                      | <i>b</i>     | <i>b</i> 95% CI | <i>beta</i>          | <i>b</i>     | <i>b</i> 95% CI | <i>beta</i>                           | <i>b</i>       | <i>b</i> 95% CI | <i>beta</i>                         | <i>b</i>       | <i>b</i> 95% CI     |
|                             |                               |              | LL UL           |                                  |              | LL UL           |                      |              | LL UL           |                                       |                | LL UL           |                                     |                | LL UL               |
| Intercept                   |                               | <b>.74*</b>  | .10 1.38        |                                  | 1.38         | -1.29 4.05      |                      | .56          | - 3.25          |                                       | <b>70.11**</b> | 59.64 80.58     |                                     | <b>68.12**</b> | 56.82 79.41         |
| Disclosure concerns         | .22                           | <b>.13**</b> | .05 .21         | .10                              | .28          | -.08 .64        | .23                  | <b>.66**</b> | .31 1.01        | 2.12                                  | -.08           | -0.56 -1.47     | .35                                 | -.16           | <b>-1.23*</b> -2.23 |
| Overall disease strain      | .24                           | <b>.08**</b> | .03 .13         | .08                              | .13          | -.07 .33        | .07                  | .11          | -.09 .32        | -.17                                  | <b>-0.62*</b>  | -1.16 -.09      | -.17                                | <b>-.71*</b>   | -1.31 -.10          |
| Overall symptom strain      | .05                           | .02          | -.05 .1         | .09                              | .22          | -.09 .53        | .07                  | .17          | -.14 .49        | -.27                                  | <b>-1.58**</b> | -2.4 -.75       | -.21                                | <b>-1.36**</b> | -2.31 -.42          |
| Anxiety                     |                               |              |                 | .48                              | <b>.46**</b> | .33 .59         |                      |              |                 |                                       |                |                 |                                     |                |                     |
| Depressive symptoms         |                               |              |                 |                                  |              |                 | .45                  | <b>.46**</b> | .33 .59         |                                       |                |                 |                                     |                |                     |
| Sex <sup>f</sup>            |                               |              |                 |                                  |              |                 |                      |              |                 | -.11                                  | -4.17          | -9.06 .72       |                                     |                |                     |
| Mental hrqol <sup>g</sup>   |                               |              |                 |                                  |              |                 |                      |              |                 | -.32                                  | <b>-.28**</b>  | -.40 -.16       |                                     |                |                     |
| Physical hrqol <sup>g</sup> |                               |              |                 |                                  |              |                 |                      |              |                 |                                       |                |                 | -.32                                | <b>-.35**</b>  | -.51 -.20           |

*Note.* \*  $p < .05$ . \*\*  $p < .01$ . Empty rows indicate that the covariate was not included in the analysis. Coefficients in bold are significant.  $\Delta R^2$  is the added explained variance of total stigma predictor after controlling for covariates. <sup>a</sup> adjusted  $R^2 = 0.11$ ;  $\Delta R^2 = 0.05$ . <sup>b</sup> adjusted  $R^2 = 0.31$ ;  $\Delta R^2 = 0.01$ . <sup>c</sup> adjusted  $R^2 = 0.35$ ;  $\Delta R^2 = 0.05$ . <sup>d</sup> adjusted  $R^2 = 0.17$ ;  $\Delta R^2 = 0.01$ . <sup>e</sup> adjusted  $R^2 = 0.15$ ;  $\Delta R^2 = 0.03$ . <sup>f</sup> 0 = male, 1 = female. <sup>g</sup> hrqol = health-related quality of life



**Table S8**

*Results of multiple regression analyses with internalized stigma as predictor with the subsample of participants who had an official confirmation of their Long Covid condition*

|                             | Perceived stress <sup>a</sup> |              |                 |      | Depressive symptoms <sup>b</sup> |              |                 |      | Anxiety <sup>c</sup> |               |                 | Physical quality of life <sup>d</sup> |             |                |                 | Mental quality of life <sup>e</sup> |             |                |                 |       |
|-----------------------------|-------------------------------|--------------|-----------------|------|----------------------------------|--------------|-----------------|------|----------------------|---------------|-----------------|---------------------------------------|-------------|----------------|-----------------|-------------------------------------|-------------|----------------|-----------------|-------|
|                             | n=189                         |              |                 |      | n=189                            |              |                 |      | n=189                |               |                 | n=184                                 |             |                |                 | n=187                               |             |                |                 |       |
|                             | <i>beta</i>                   | <i>b</i>     | <i>b</i> 95% CI |      | <i>beta</i>                      | <i>b</i>     | <i>b</i> 95% CI |      | <i>beta</i>          | <i>b</i>      | <i>b</i> 95% CI |                                       | <i>beta</i> | <i>b</i>       | <i>b</i> 95% CI |                                     | <i>beta</i> | <i>b</i>       | <i>b</i> 95% CI |       |
|                             |                               |              | LL              | UL   |                                  |              | LL              | UL   |                      |               | LL              | UL                                    |             |                | LL              | UL                                  |             |                | LL              | UL    |
| Intercept                   |                               | <b>.87**</b> | .25             | 1.48 |                                  | 1.96         | -.66            | 4.58 |                      | 1.53          | -1.09           | 4.15                                  |             | <b>69.37**</b> | 58.80           | 79.87                               |             | <b>64.98**</b> | 54.04           | 75.92 |
| Internalized stigma         | .05                           | <b>.24**</b> | .15             | .34  | .25                              | <b>.86**</b> | .38             | 1.33 | .33                  | <b>1.17**</b> | .71             | 1.62                                  | -.01        | -.10           | -1.29           | 1.10                                | -.29        | <b>-2.70**</b> | -3.93           | -1.48 |
| Overall disease strain      | .02                           | <b>.07**</b> | .03             | .12  | .08                              | .12          | -.08            | .32  | .07                  | -.11          | -.09            | .30                                   | -.17        | <b>-.63*</b>   | -1.17           | -.09                                | -.14        | <b>-.61*</b>   | -1.20           | -.02  |
| Overall symptom strain      | .04                           | .01          | -.07            | .08  | .16                              | .18          | -.13            | .48  | .05                  | .12           | -.19            | .42                                   | -.28        | <b>-1.60**</b> | -2.44           | -.77                                | -.17        | <b>-1.10*</b>  | -2.03           | -.17  |
| Anxiety                     |                               |              |                 |      | .07                              | <b>.38**</b> | .24             | .51  |                      |               |                 |                                       |             |                |                 |                                     |             |                |                 |       |
| Depressive symptoms         |                               |              |                 |      |                                  |              |                 |      | .37                  | <b>.38**</b>  | .24             | .51                                   |             |                |                 |                                     |             |                |                 |       |
| Sex <sup>f</sup>            |                               |              |                 |      |                                  |              |                 |      |                      |               |                 |                                       | -.11        | -4.10          | -9.03           | .83                                 |             |                |                 |       |
| Mental hrqol <sup>g</sup>   |                               |              |                 |      |                                  |              |                 |      |                      |               |                 |                                       | -.31        | <b>-.27**</b>  | -.39            | -.14                                |             |                |                 |       |
| Physical hrqol <sup>g</sup> |                               |              |                 |      |                                  |              |                 |      |                      |               |                 |                                       |             |                |                 |                                     | -.29        | <b>-.32**</b>  | -.47            | -.17  |

*Note.* \* $p < .05$ . \*\* $p < .01$ . Empty rows indicate that the covariate was not included in the analysis. Coefficients in bold are significant.  $\Delta R^2$  is the added explained variance of total stigma predictor after controlling for covariates. <sup>a</sup> adjusted  $R^2 = 0.17$ ;  $\Delta R^2 = 0.11$ . <sup>b</sup> adjusted  $R^2 = 0.35$ ;  $\Delta R^2 = 0.04$ . <sup>c</sup> adjusted  $R^2 = 0.38$ ;  $\Delta R^2 = 0.08$ . <sup>d</sup> adjusted  $R^2 = 0.16$ ;  $\Delta R^2 = 0.00$ . <sup>e</sup> adjusted  $R^2 = 0.21$ ;  $\Delta R^2 = 0.08$ . <sup>f</sup> 0 = male, 1 = female. <sup>g</sup> hrqol = health-related quality of life .
